## **Cultured *Ostreococcus* is cobalamin-independent**

Mark Paul Pašek

2455 Rice Boulevard

Houston, TX 77005 USA

saltwateralgae@yahoo.com

### **Abstract**

The marine microalga *Ostreococcus* is considered to depend on the methionine synthase METH and its methylated cobalamin cofactor for methionine synthesis because it lacks METE, the methylcobalamin-independent methionine synthase. Here I describe minimal media lacking both biotin and cobalamin yet suitable for growth of cultured *Ostreococcus*.

### **Keywords**

*Ostreococcus*; METE; METH; minimal medium; gellan gum; *METE* selection; biotin; cobalamin; methionine; bacterioplankton

### **Introduction**

The marine unicellular alga *Ostreococcus* has evolved clades A, B, and C, each with sequenced representatives, as well as clade D, *Ostreococcus mediterraneus* (Subirana et al., 2013). The model of methionine biosynthesis in *Ostreococcus* states that METH [methylcobalamin-dependent] is the sole methionine synthase and is based on the identification of the gene encoding METH in all three clades. In addition, the gene encoding METE [5-methyltetrahydrofolate-dependent; cobalamin-independent] appears missing for all three clades, leading to the prediction of cobalamin-dependent growth (Helliwell et al., 2011). These observations suggest that if *Ostreococcus* cells were transformed with synthetic DNA designed to express METE, transformants would utilize the endogenous METH substrate 5-methyltetrahydrofolate to synthesize methionine and could be selected in minimal medium in the absence of cobalamin.

### **Materials and Methods**

*Ostreococcus* cell cultures were obtained from the Roscoff Culture Collection, Roscoff, France, and the Provasoli-Guillard National Center for Marine Algae and Microbiota, East Boothbay, Maine, USA. Panels of candidates to be evaluated for DNA transformation were assembled. The panel for clade A consisted of NCMA2972 (Palenik et al., 2007), RCC754, RCC755, and

RCC756. The panel for clade C included RCC614 and RCC745 (Derelle et al., 2006). The members of the panel for clade D were RCC789, RCC1107, RCC1119, and RCC1121.

*Ostreococcus* cells were cultured in suspension by rocking under continuous blue illumination in minimal medium at room temperature. Minimal medium is artificial seawater (McDonald et al., 2010) supplemented with 0.9 mM NaNO<sub>3</sub>, 100 μM Na<sub>2</sub>EDTA•2H<sub>2</sub>O, 10 μM NaH<sub>2</sub>PO<sub>4</sub>•H<sub>2</sub>O, 10 μM FeNaEDTA, 0.9 μM MnCl<sub>2</sub>•4H<sub>2</sub>O, 300 nM thiamine•HCl, 100 nM Na<sub>2</sub>SeO<sub>3</sub>, 80 nM ZnSO<sub>4</sub>•7H<sub>2</sub>O, 30 nM Na<sub>2</sub>MoO<sub>4</sub>•2H<sub>2</sub>O, and 10 nM CuSO<sub>4</sub>•5H<sub>2</sub>O. This list of supplements is simplified from that formulated by Keller (Keller et al., 1987), most notably lacking biotin, cyanocobalamin, CoSO<sub>4</sub>•7H<sub>2</sub>O, NH<sub>4</sub>Cl, and tris(hydroxymethyl)aminomethane. In addition, the selenite concentration is 10 nM in Keller medium.

For polymerase chain reaction DNA amplification, template DNA was prepared with Quick-gDNA™ from Zymo Research, PCR primer pairs were synthesized by Integrated DNA Technologies, and targets were amplified with the Q5 DNA polymerase from New England BioLabs.

## Results

Using DNA from RCC614 and RCC745 as template and two primer pairs for each of the two targets *METH* and *URA5/3*, polymerase chain reaction DNA amplification yielded in each case DNA fragments of the predicted size, and authenticated cell culture identity as *Ostreococcus* after long-term serial culture in minimal medium with 400 pM cobalamin. For NCMA2972, a primer pair also targeting *URA5/3* was used (Table 1).

Minimal medium with cobalamin supported extended serial growth for each cell culture in each clade. In addition, minimal medium containing cobalamin and solidified with 0.125% gellan gum (Sigma-Aldrich) supported diverse green bacterioplanktonic surface growth (Figure 1) for each cell culture in each clade, with the exception of NCMA2972.

As a transformation host, RCC614 was chosen. Mock transformation experiments, without synthetic DNA, were designed to quantitate and evaluate background growth on solidified minimal medium lacking cobalamin. RCC614 suspension cells were cultured in minimal medium with 400 pM cobalamin. 10<sup>6</sup> cells (100 μl) were mixed with 50 μl CutSmart® restriction enzyme buffer [50 mM potassium acetate-10 mM magnesium acetate-20 mM tris(hydroxymethyl)aminomethane acetate (pH 7.9)-100 μg/ml bovine serum albumin; New England BioLabs], layered onto 100 μl protoplast transformation buffer [100 mM CaCl<sub>2</sub>-200 mM mannitol-40% PEG4000; Yoo et al., 2007], briefly vortexed, incubated for 5 minutes at room temperature, diluted into 10 ml of minimal medium containing 20 pM cobalamin, and cultured for 24 hours. Cells were then aerosolized onto minimal media lacking cobalamin solidified with 0.125% gellan gum at a density of 10<sup>5</sup> cells per 90 mm plate (20 ml solid media per plate). After 10 days at room temperature, approximately 10 to 20 green bacterioplanktonic colonies per plate emerged at normal growth rates.

Twelve cobalamin-independent colonies were picked into minimal medium without cobalamin and cultured; all cultured remained cobalamin-independent after more than 10 serial passages (1/200 dilution/passage). Each cobalamin-independent culture was authenticated as RCC614 by

polymerase chain reaction DNA amplification using the primer pair for *URA5/3* listed in Table 1 which yields a 3207 bp diagnostic fragment (Figure 2).

It is concluded that cobalamin-independent *Ostreococcus* colonies are obtained at a frequency of approximately 0.01% when selected on gellan gum-solidified minimal medium without cobalamin.

## Discussion

The utility of *METE* as a positive selection marker relies on a cobalamin-dependent *Ostreococcus* transformation recipient. RCC614 is a representative co-culture of *Ostreococcus* and various phycosphere-associated marine bacteria (Abby et al., 2014; Lupette et al., 2016). The bacteria may supply biotin, cobalamin, and methionine to the *Ostreococcus* phycosphere. A mock transformation as described above of RCC614 will yield *Ostreococcus* bacterioplanktonic colony growth on minimal medium with no added biotin and cobalamin, as observed. Only a cobalamin-dependent *Ostreococcus* cell culture, not necessarily biotin-independent, is required to implement the use of *METE* as a positive selection marker.

Both RCC614 and *Ostreococcus* RCC809 (Grigoriev, 2011; clade B) lack the gene encoding the algal-specific cobalamin acquisition protein 1, whereas NCMA2972 has it (Bertrand et al., 2012). Perhaps *Ostreococcus* clades C and B obtain methionine from their phycosphere while clade A can utilize cobalamin in addition.

## References

- Abby, S.S., Touchon, M., De Jode, A., Grimsley, N., Piganeau, G., 2014. Bacteria in *Ostreococcus tauri* cultures - friends, foes, or hitchhikers? *Frontiers in Microbiology* 5, Article 505.  
doi: 10.3389/fmicb.2014.00505
- Bertrand, E.M., Allen, A.E., Dupont, C.L., Norden-Krichmar, T.M., Bai, J., Valas, R.E., Saito, M.A., 2012. Influence of cobalamin scarcity on diatom molecular physiology and identification of a cobalamin acquisition protein. *PNAS* 109 (26), E1762–E1771.  
doi: 10.1073/pnas.1201731109
- Derelle, E., Ferraz, C., Rombauts, S., Rouzé, P., Worden, A.Z., Robbens, S., Partensky, F., Degroeve, S., Echeynié, S., Cooke, R., Saeys, Y., Wuyts, J., Jabbari, K., Bowler, C., Panaud, O., Piégu, B., Ball, S.G., Ral, J-P., Bouget, F-Y., Piganeau, G., De Baets, B., Picard, A., Delseny, M., Demaille, J., Van de Peer, Y., Moreau, H., 2006. Genome analysis of the smallest free-living eukaryote *Ostreococcus tauri* unveils many unique features. *PNAS* 103 (31), 11647-11652.  
doi: 10.1073/pnas.0604795103

Grigoriev, I.V., Nordberg, H., Shabalov, I., Aerts, A., Cantor, M., Goodstein, D., Kuo, A., Minovitsky, S., Nikitin, R., Ohm, R.A., Otiillar, R., Poliakov, A., Ratnere, I., Riley, R., Smirnova, T., Rokhsar, D., Dubchak, I., 2012. The Genome Portal of the Department of Energy Joint Genome Institute. *Nucleic Acids Research* 40 (D1), D26-D32.  
doi: 10.1093/nar/gkr947

Helliwell, K.E., Wheeler, G.L., Leptos, K.C., Goldstein, R.E., Smith, A.G., 2011. Insights into the Evolution of Vitamin B12 Auxotrophy from Sequenced Algal Genomes. *Mol. Biol. Evol.* 28(10), 2921–2933.  
doi: 10.1093/molbev/msr124

Lupette, J., Lami, R., Krasovec, M., Grimsley, N., Moreau, H., Piganeau, G., Sanchez-Ferandin, S., 2016. *Marinobacter* Dominates the Bacterial Community of the *Ostreococcus tauri* Phycosphere in Culture. *Frontiers in Microbiology* 7, Article 1414.  
doi: 10.3389/fmicb.2016.01414.

Keller, M.D., Selvin, R.C., Claus, W., Guillard, R.R.L., 1987. Media for the culture of oceanic ultraphytoplankton. *J. Phycol.* 23, 633-638.  
doi: 10.1111/j.1529-8817.1987.tb04217.x

McDonald, S.M., Plant, J.N., Worden, A.Z., 2010. The Mixed Lineage Nature of Nitrogen Transport and Assimilation in Marine Eukaryotic Phytoplankton: A Case Study of *Micromonas*. *Mol. Biol. Evol.* 27(10), 2268–2283.  
doi: 10.1093/molbev/msq113

Palenik, B., Grimwood, J., Aerts, A., Rouzé, P., Salamov, A., Putnam, N., Dupont, C., Jorgensen, R., Derelle, E., Rombauts, S., Zhou, K., Otiillar, R., Merchant, S.S., Podell, S., Gaasterland, T., Napoli, C., Gendler, K., Manuell, A., Tai, V., Vallon, O., Piganeau, G., Jancek, S., Heijde, M., Jabbari, K., Bowler, C., Lohr, M., Robbens, S., Werner, G., Dubchak, I., Pazour, G.J., Ren, Q., Paulsen, I., Delwiche, C., Schmutz, J., Rokhsar, D., Van de Peer, Y., Moreau, H., Grigoriev, I.V., 2007. The tiny eukaryote *Ostreococcus* provides genomic insights into the paradox of plankton speciation. *PNAS* 104 (18), 7705-7710.  
doi: 10.1073/pnas.0611046104

Subirana, L., Péquin, B., Michely, S., Escande, M-L., Meilland, J., Derelle, E., Marin, B., Piganeau, G., Desdevises, Y., Moreau, H., Grimsley, N.H., 2013. Morphology, Genome Plasticity, and Phylogeny in the Genus *Ostreococcus* Reveal a Cryptic Species, *O. mediterraneus* sp. nov. (Mamiellales, Mamiellophyceae). *Protist* 164, 643-659.  
doi: 10.1016/j.protis.2013.06.002

Yoo, S-D., Cho, Y-H., Sheen, J., 2007. *Arabidopsis* mesophyll protoplasts: a versatile cell system for transient gene expression analysis. *Nature Protocols* 2 (7), 1565-1572.  
doi: 10.1038/nprot.2007.199

**Table 1**

List of PCR primer pairs, DNA sequences, and DNA product sizes

for RCC614 and RCC745 (*Ostreococcus tauri*):

|                                                   |                                                                |         |
|---------------------------------------------------|----------------------------------------------------------------|---------|
| <i>METH</i> 5'.f                                  | GGGGCAGATTTTGTACATTAGCAGTAA                                    | 1068 bp |
| <i>METH</i> 5'.r                                  | AAAACCTAGAGTATGTGCGATGGACATGGGGTCGACGAACTCCTTGTAAGTC           |         |
| <i>METH</i> 3'.f                                  | CGCGCCGAATATGGGAAAGAGTAGAAGCAGCGTATTTACTTAGTCTATTTCTTTTTAAAAG. | 1024 bp |
| <i>METH</i> 3'.r                                  | CGCAGTTACCGGATGAGGATG                                          |         |
| <i>URA5/3.f</i>                                   | TATCGCATGCGCTTTGCAT                                            | 3689 bp |
| <i>URA5/3.r</i>                                   | TGAAAGTGGAGAAGGTTCCGGACT                                       |         |
| <i>URA5/3.f</i>                                   | CAGCGGCCTGCAGGAAATGAGAAG                                       | 3207 bp |
| <i>URA5/3.r</i>                                   | CTCGAGCTTTTGAACCAACTCGACGGTTT                                  |         |
| for NCMA2972 ( <i>Ostreococcus lucimarinus</i> ): |                                                                |         |
| <i>URA5/3.f</i>                                   | GTCTAGAGCTTGATTTCCACGTCAACC                                    | 4039 bp |
| <i>URA5/3.r</i>                                   | GAGGAATTGCACATGTTGCAGGA                                        |         |

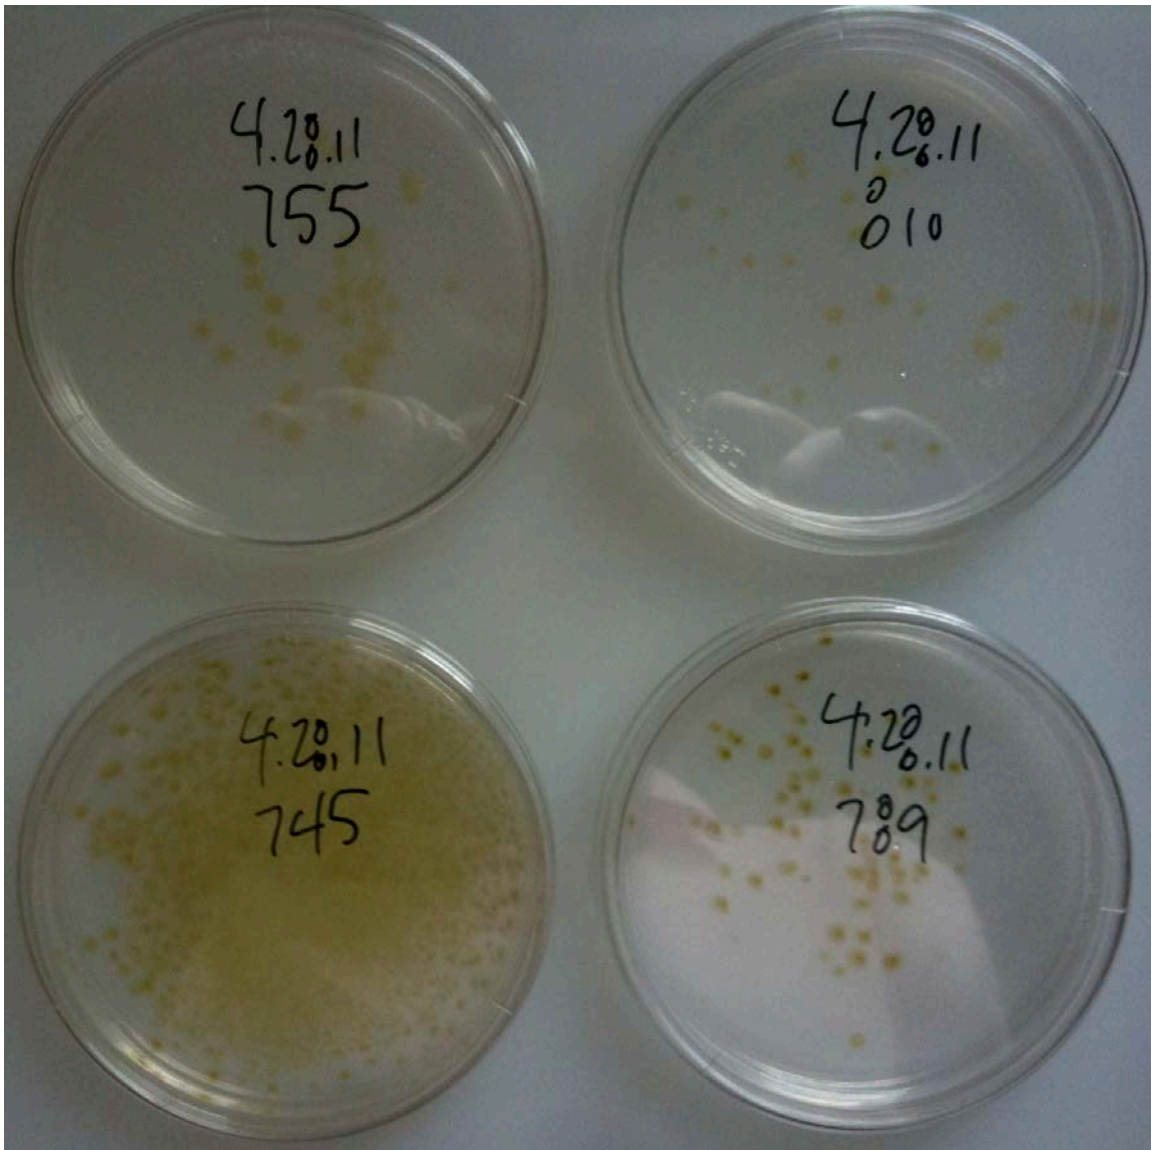

**Figure 1.** Bacterioplanktonic growth of *Ostreococcus* clades A, C, and D on minimal medium with cobalamin solidified with 0.125% gellan gum.



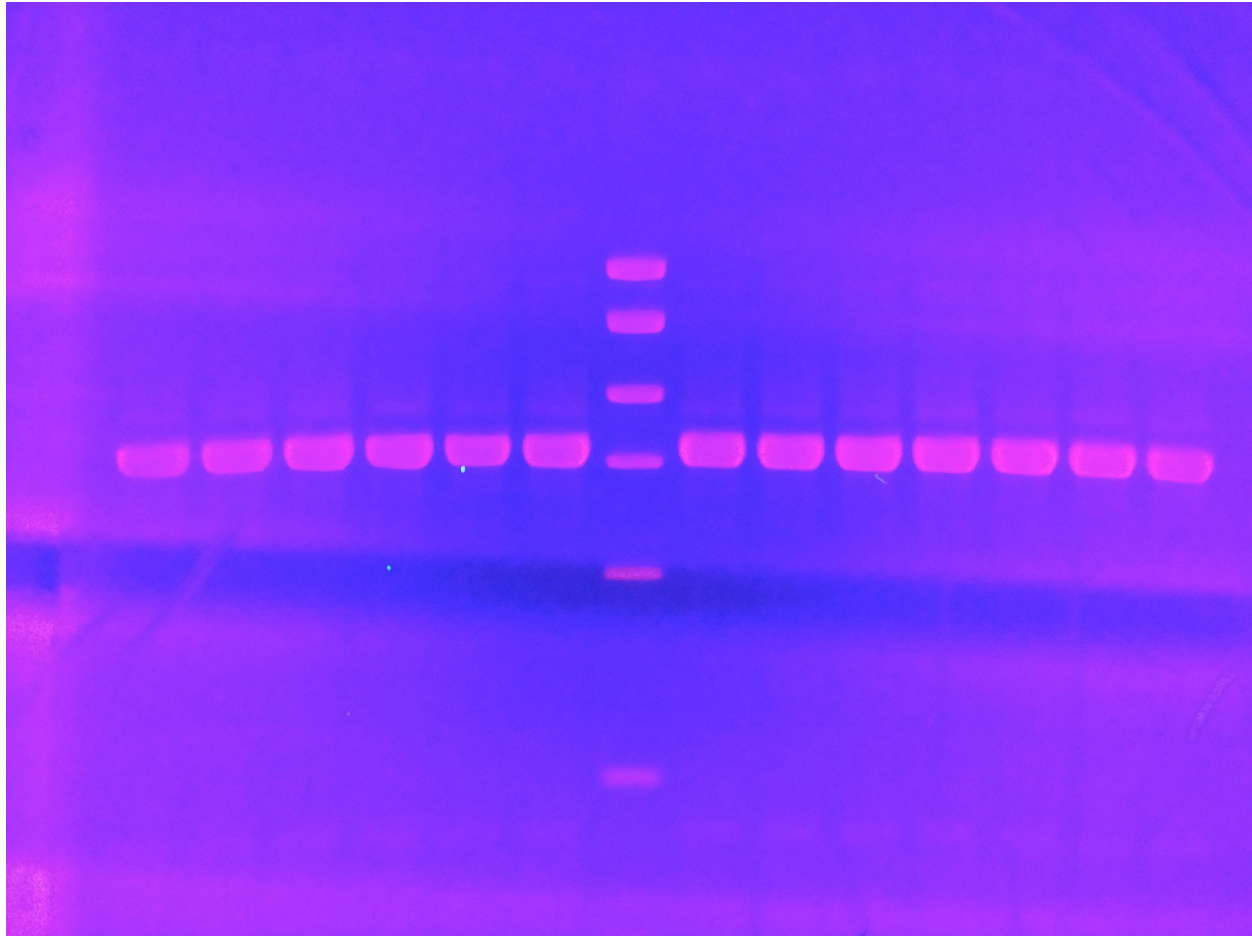

**Figure 2.** PCR authentication of cobalamin-independent clones as *Ostreococcus tauri* RCC614.

Lanes 1-6 and 9-14 correspond to cobalamin-independent clones isolated on gellan gum-solidified minimal medium lacking cobalamin. Lane 8 is RCC614. Lane 7 is the Mass DNA ladder from New England BioLabs. The diagnostic 3207 bp DNA fragment is synthesized with a primer pair targeting the *URA5/3* locus (Table 1).
